# Supplementary material for: X Chromosome Reactivation Initiates in Nascent Primordial Germ Cells in Mice
Source: PLOS journal article supplement (doi:10.1371/journal.pgen.0030116), 2007-07-25
Supplement: S4 (10.1371/journal.pgen.0030116.s004) [file journal.pgen.0030116.s004]

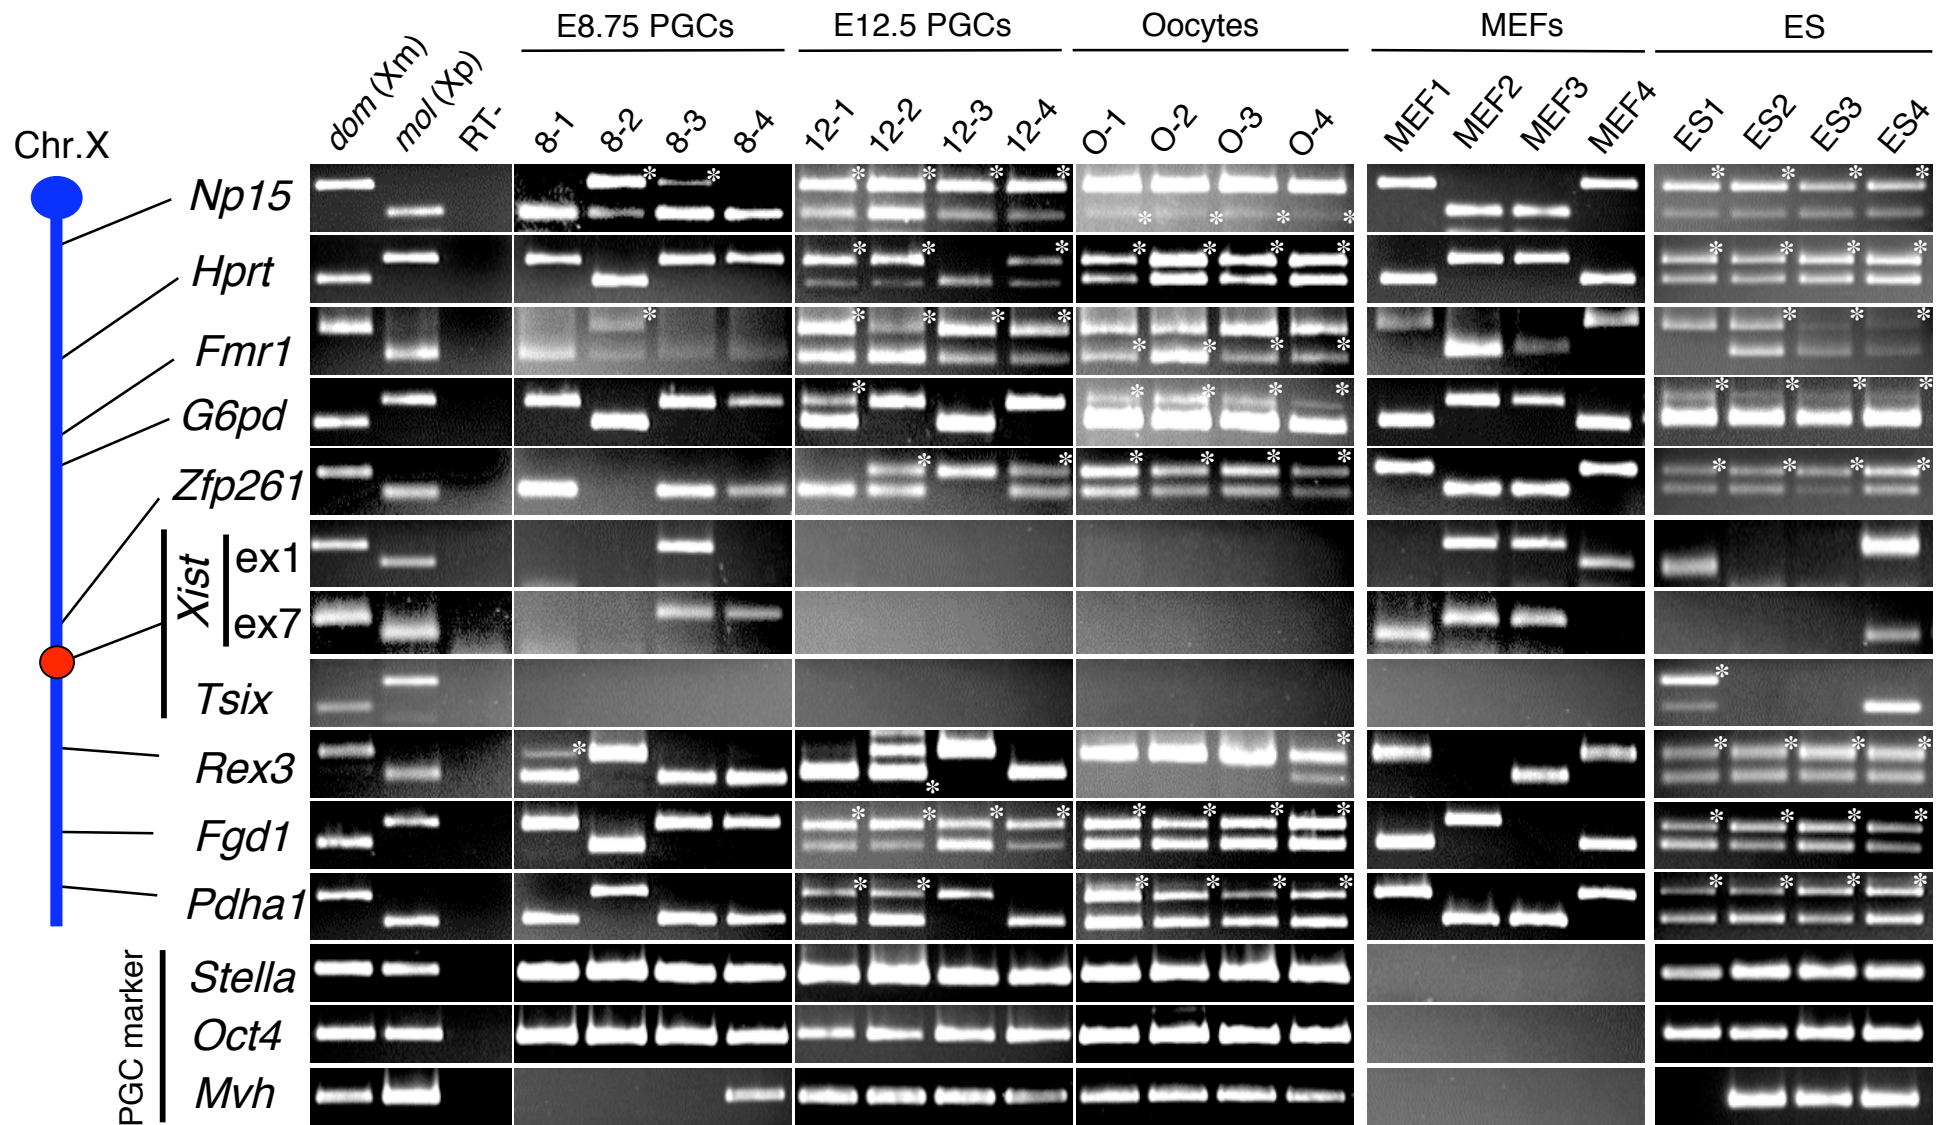

**Figure. S4.** Single-cell RT-PCR results of E8.75 PGCs, E12.5 PGCs, oocytes, MEFs, and ES cells. E8.75 and E12.5 PGCs were isolated from hybrid embryos generated from Oct4-GFP × MSM/Ms matings, and oocytes were from superovulated hybrid females. MEFs and ES cells were used as controls. Asterisks indicate biallelic expression.
